# Supplementary material for: Progressive Encephalomyelitis with Rigidity and Myoclonus Resolving after Thymectomy with Subsequent Anasarca: An Autopsy Case
Source: PubMed Central journal article supplement — Intern Med. 2018 Jul 6;57(23):3451–8. doi: 10.2169/internalmedicine.1238-18 (PMC6306531; doi:10.2169/internalmedicine.1238-18), 2018-07-06
Supplement: 1349-7235-57-3451-s001.pdf [file 1349-7235-57-3451-s001.pdf]

Supplementary Table 1. Antibodies used in a case of progressive encephalomyelitis with rigidity and myoclonus.

| Antibody      | Clone       | Company                  | Code          | Dilution     | Detection Method |
|---------------|-------------|--------------------------|---------------|--------------|------------------|
| CD3           | LN10        | Leica Biosystems         | NCL-L-CD3-565 | 100          | ABC              |
| CD4           | 4B12        | Leica Biosystems         | NCL-L-CD4-368 | 50           | ABC              |
| CD20cy        | L26         | Agilent Technologies     | IR604         | Ready-to-use | ABC              |
| CD34          | NU-4A1      | Nichirei Bioscience      | 413111        | Ready-to-use | Polymer          |
| CD68          | KP1         | Agilent Technologies     | IR609         | 2,000        | Polymer          |
| c-Kit (CD117) | rabbit poly | Agilent Technologies     | A4502         | 200          | Polymer          |
| Desmin        | D33         | Monosan                  | MON3001       | 50           | Polymer          |
| DOG-1         | RBT-DOG1    | Bio SB                   | BSB6273       | 50           | Polymer          |
| IgG           | rabbit poly | Agilent Technologies     | IR512         | 4            | Polymer          |
| S-100A        | rabbit poly | Agilent Technologies     | Z0628         | 2,000        | Polymer          |
| $\alpha$ -SMA | 1A4         | Agilent Technologies     | M0851         | 400          | Polymer          |
| PDGFRa        | rabbit poly | Santa Cruz Biotechnology | sc-338        | 80           | Polymer          |
| PDGFRb        | rabbit poly | Santa Cruz Biotechnology | sc-339        | 100          | Polymer          |

$\alpha$ -SMA, Alpha smooth muscle actin; PDGFR, Platelet-derived growth factor receptor.
